# Supplementary material
Source: publisher figshare collection journal article supplement (https://karger.figshare.com/ndownloader/files/8718247)
Supplement: Supplementary file 1 [file 8718247]

**Supplement Table 1. Multivariate Analysis of 3-Month Unfavorable Outcome Defined as mRS≧2 After Intravenous Thrombolysis**

| **Variable** | **OR (95% CI)** | ***p* value** |
| --- | --- | --- |
| ln D-dimer(μg/mL) | 1.92(1.26-2.93) | 0.002 |
| Age, per year | 0.99(0.95-1.03) | 0.522 |
| Male | 0.84(0.37-1.94) | 0.689 |
| Latency from stroke onset to D-dimer test, per hour | 0.94(0.88-1.01) | 0.089 |
| NIHSS on admission, per score | 1.28(1.17-1.41) | <0.001 |
| Standard dose of rt-PA (0.9 mg/kg) | 0.48(0.17-1.36) | 0.167 |
| Atrial fibrillation | 0.65(0.26-1.60) | 0.350 |
| Estimated glomerular filtration rate, per mL/min/1.73m2 | 1.00(0.99-1.02) | 0.736 |
